## **OPETH: Open Source Solution for Real-time Peri-event Time Histogram**

### **Based on Open Ephys**

**András Széll<sup>1,3</sup>, Sergio Martínez-Bellver<sup>1,3</sup>, Panna Hegedüs<sup>1,2</sup>, Balázs Hangya<sup>1,\*</sup>**

<sup>1</sup>Lendület Laboratory of Systems Neuroscience, Institute of Experimental Medicine, Hungarian Academy of Sciences, Budapest, H-1083, Hungary

<sup>2</sup>János Szentágothai Doctoral School of Neurosciences, Semmelweis University, Budapest, H-1085, Hungary

<sup>3</sup>These authors contributed equally.

\* Correspondence:

Dr. Balázs Hangya

hangya.balazs@koki.mta.hu

**Running title:** Online Peri-Event Time Histogram

**Keywords:** Open source, Open Ephys, peri-event time histogram, optogenetics

## Abstract

Single cell electrophysiology remains one of the most widely used approaches of systems neuroscience. Real-time feedback during electrophysiology experiments is important to guide experimental decisions that eventually determine the quality of recording, duration of the project and value of the collected data. We present an open-source tool that enables flexible online visualization of action potential alignment to external events, called the peri-event or peri-stimulus time histogram (OPETH). Based on the Open Ephys open source data acquisition system, we developed a Python interface for real-time plotting of neuronal spike times and evoked waveforms with respect to external events represented by digital logic signals. These digital inputs may signal photostimulation time stamps for *in vivo* optogenetic identification of cell types or the times of behaviorally relevant events during *in vivo* behavioral neurophysiology experiments. Therefore, OPETH allows real-time identification of genetically defined neuron types or behaviorally responsive populations. By allowing ‘hunting’ for neurons of interest, OPETH may significantly increase the efficiency of experiments that combine *in vivo* electrophysiology with behavior or optogenetic tagging of neurons.

## Introduction

Neurons are diverse. Often they are categorized based on their neurotransmitters, neuropeptides, calcium-binding proteins, ion channels and other markers (Ascoli et al., 2008; Klausberger and Somogyi, 2008). These usually entail the specific expression of proteins, which provides a genetic handle on these cell types (Harris et al., 2018). This allowed the recent introduction of optogenetic cell type identification or optogenetic tagging (Cohen et al., 2012; Kvitsiani et al., 2013; Lima et al., 2009). In brief, the expression of a restriction endonuclease, most often Cre, is controlled by a genomic promoter, and a light sensitive ion channel or pump is introduced in a Cre-dependent manner (Boyden et al., 2005). Thus, the cell type defined by the promoter becomes photosensitive, allowing their identification on extracellular recording: the cells that respond to light with short latency, precisely timed action potentials belong to the given class (Hangya et al., 2014; Kvitsiani et al., 2013; Lima et al., 2009). Previously, *in vivo* cell type identification was only possible with juxtacellular recording and labeling or *in vivo* whole cell patch clamp, which were mostly restricted to anesthetized recordings (Pinault, 1996). While still often relatively low yield, optogenetic tagging opened the gate for larger scale recording of identified neurons in awake behaving animals. However, neurons are often identified during off-line analysis, which limits the flexibility and planning of the experiments, resulting in lower number of tagged cells and longer projects.

A caveat of optogenetic tagging studies is that light may induced different signals besides action potentials, including photoelectric (Becquerel) and photovoltaic effects (Kozai and Vazquez, 2015), or exciting too many neuronal elements summing up to population spikes that prevent proper spike sorting. The uneven dispersion of light in brain tissue may lead to artifacts that are

hard to remove by offline referencing techniques, as pointed out in previous studies (Cardin et al., 2010; Mikulovic et al., 2016; Park et al., 2014). Most of these potential confounds can be efficiently eliminated by proper control of light intensities delivered into the brain, for which precise on-line feedback is immensely useful.

Additionally to genetically defined types, neurons are often characterized by the relation of their firing pattern to external events *in vivo*. For instance, neurons of sensory cortices are categorized by their response to sensory stimuli (Gentet et al., 2012; Hires et al., 2015); in reverse, the features of sensory events that activate a given neuron gave rise to the concept of the receptive field (Hubel and Wiesel, 1959; Kilgard and Merzenich, 1998; Ko et al., 2011). Neurons thought to participate in cognitive processing are analyzed with respect to the salience and motivational value of external stimuli (Hangya et al., 2015; Lin and Nicolelis, 2008; Schultz et al., 1997), while neurons on the effector side are correlated with muscle activity and movements (DeLong, 1971). To visualize and quantify the correlation between these external events and neural activity, a linear correlation technique called the peri-event or peri-stimulus time histogram is usually applied (Endres et al., 2008; Solari et al., 2018). The PETH is a histogram of relative action potential times with respect to the event of interest; thus, it is mathematically equivalent to the cross-correlation (convolution) of spike and event times. When aiming to study a specific group of neurons, e.g. classically tuned neurons of the primary auditory cortex (Hromádka et al., 2008; Pi et al., 2013), or reward activated neurons of the VTA (Cohen et al., 2012; Schultz et al., 1997), it is particularly helpful to have a real-time PETH readout during positioning the recording electrodes.

Therefore we developed a real-time ‘online’ PETH or OPETH based on the Open Ephys open source data acquisition system (Siegle et al., 2017). This constitutes of a modified ZeroMQ plugin for distributed messaging and a Python interface that receives the data and visualizes peri-event time histograms and evoked waveforms quasi real time. These tools are useful for tracking the neuronal responses to light stimulation for optogenetic tagging or to behaviorally relevant events during animal training. We find that OPETH helps guide experimental decisions and greatly speeds up optogenetic experiments by allowing ‘hunting’ for tagged neurons.

## Methods

In this section we provide a system overview, a description of the Open Ephys ZMQ plugin and setting up the signal chain and the detailed presentation of the Python GUI interface for OPETH. Source code is available at <https://github.com/hangyabalazs/ZMQInterface.git> and <https://github.com/hangyabalazs/opeth.git>.

### *System overview*

Animals were implanted with custom-built implants that include Omnetics connectors that can interface with the Intan RHD2000 chip series, compatible with the Open Ephys system (Siegle et

al., 2017; Solari et al., 2018). Data were amplified, digitized and digitally multiplexed by one or two 32-channel Intan Headstages RHD2132, providing 32- or 64-channel digital recordings. Data were transferred to the Open Ephys acquisition board by Intan Serial Peripheral Interface (SPI) cables.

Neural data were acquired at 30 kHz sampling rate by the open source, plug-in based Open Ephys Data Acquisition System. We used a modified ZMQ plug-in (<https://neuroinformatics.nl/drupal/?q=node/181>) to stream data to external programs and accessed the ZMQ data stream from Python programming language. The OPETH GUI, implemented in Python, visualizes online PETH and evoked waveform plots, providing access to spike discrimination thresholds and other parameters.

We used the BPod Behavior Control System (Sanworks Inc.) for real-time behavioral control during animal training. BPod is an open source, microcontroller-based system implementing a finite state machine optimized for low latencies that allow the combination of electrophysiology, optogenetics and animal behavior (<https://sanworks.io/shop/products.php?productFamily=bpod>). BPod sent TTL pulses at each stimulus onset and reward (water) or punishment (air puff) delivery to synchronize behavioral events with neural recordings.

We used the PulsePal stimulator (Sanworks Inc.) to trigger 1 ms square pulses of a blue laser (Sanctity Laser, SSL-473-0100-10TM-D-LED) at 20 Hz with 2 s ON - 3 s OFF duty cycle. The laser light was delivered to the target area by a patch cable (Thorlabs), LC-LC type optical connectors (Thorlabs) and a 50 $\mu$ m core optical fiber (Laser Components) for optogenetic tagging. TTL pulses were sent both to the blue laser and to Open Ephys to synchronize photostimulation and recording.

System components are summarized in Table 1.

*Table 1:* List of main components used during the experiments

| <b>Device</b>                      | <b>Company</b>     |
|------------------------------------|--------------------|
| Intan Headstage RHD2132            | Intan Technologies |
| Serial Peripheral Interface cables | Intan Technologies |
| Open Ephys acquisition board       | Open Ephys         |
| Open Ephys Input Output board      | Open Ephys         |
| BPod Behavior Control System       | Sanwork Inc.       |
| PulsePal                           | Sanwork Inc.       |
| Blue Laser SSL-473-0100-10TM-D-LED | Sanctity Laser     |

|                                                                   |                    |
|-------------------------------------------------------------------|--------------------|
| Custom-built recording microdrive for electrodes and optic fibers | Multiple companies |
| Silicon probes                                                    | Neuronexus         |

### Open Ephys plug-ins

Open Ephys is an open source platform for multi-channel electrophysiology experiments (Siegle et al., 2017). Its plugin-based workflow is designed to facilitate real-time feedback in neuroscience experiments. We used the ZeroMQ interface by Francesco Battaglia (Donders Institute, Radboud University) implemented as a filter plug-in to Open Ephys, modified to support more recent Open Ephys versions. ZeroMQ is a lightweight network library that simplifies setting up some typical network topologies. The plugin broadcasts recorded data and events that can be subscribed to by external applications through ZeroMQ sockets created by ZmqInterface.cpp. The plugin uses a heartbeat mechanism to track which applications are currently connected to the data stream. The data content is dependent on the position of the ZMQ plug-in in the signal chain. We suggest sending filtered data appropriate for spike detection using the plug-in. For instance, band-pass filtering between 600-6000 Hz enables threshold-based action potential detection. Our Python interface implements thresholding itself, therefore a Spike Detector plug-in should not be included before the ZMQ interface. We use the following signal chain: Rhythm FPGA – Common Average Reference – Bandpass filter – ZMQ Interface – LFP viewer (Figure 1).

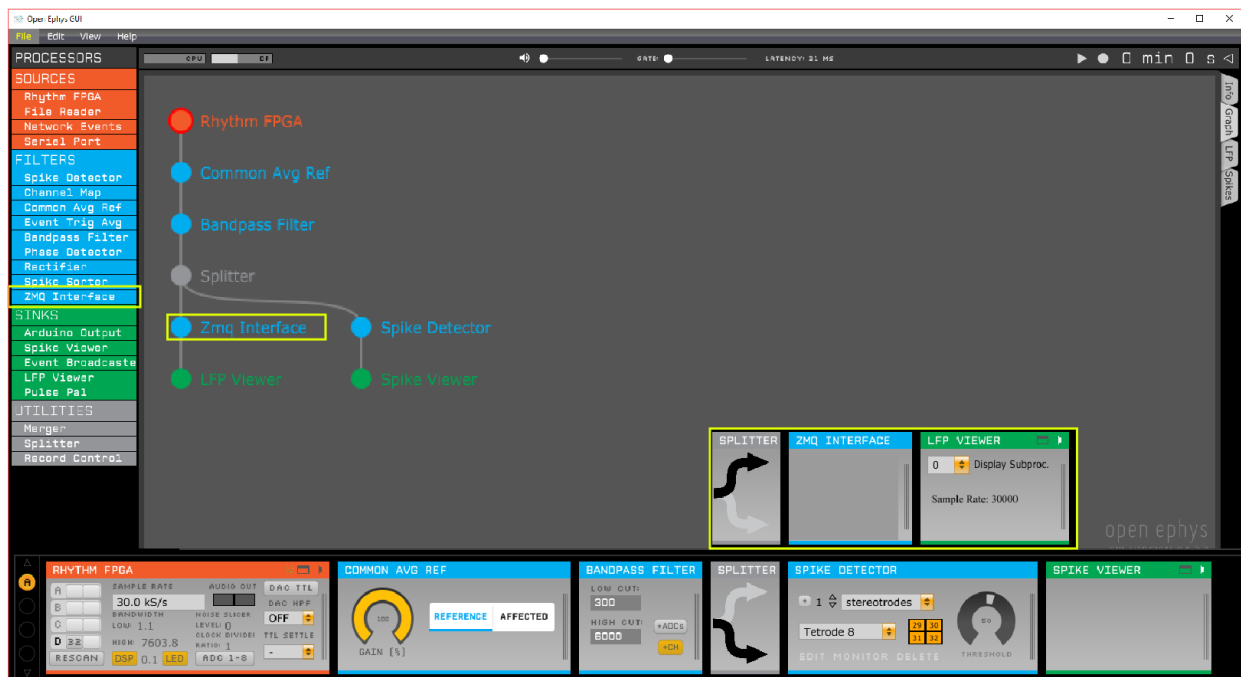

**Figure 1: Open Ephys signal chain used to produce the figures of this work.** The ZMQ interface (yellow box) is positioned after the ‘Bandpass filter’ and before the ‘LFP viewer’.

The ZMQ Interface plugin opens a ZMQ publisher socket to allow one or more ZMQ clients to subscribe (connect) locally or over the network. Though the system is typically used with a single client connected locally, it is possible to use multiple clients on multiple PCs analyzing the same Open Ephys data source simultaneously with different settings. The ZMQ plugin creates JSON format data packets from the digitized data and event metadata (e.g. timestamp, event channel, number of data channels and sample count) and sends it over to the client(s). Another socket for event messages and responses is used for heartbeat messages to inform the plugin about the connected clients.

### *Python GUI*

We developed a graphical user interface in Python based on pyqtgraph to visualize PETHs aligned to external events during data acquisition in real time. The GUI is compatible with Python 2.7 and Python 3 as well.

*Histogram window.* The main GUI window is handled by gui.py, which schedules data reading, spike discrimination, performs histogram calculation and enables the adjustment of parameter setup. The main window displays histograms, parameters and buttons for handling the configuration and the different plots (Figure 2).

Histogram channels are collected in groups of four by default as for classical tetrode recordings, but the ‘Channels per plot’ option can be set from 1 to 8 allowing visualization for single electrodes, stereotrodes or silicone probes of different channel configurations. The different weight of each channel of the polytrode can be visualized separately in each histogram window by setting ‘Histogram color’ (Supplementary figure 1A) to ‘aggregate’ (Supplementary figure 1B). This way, the resultant graphic displays a combined multicolored histogram, showing each channel’s contribution to the histogram in a different color. If the channels of a tetrode are to be compared, it is recommended to use the ‘channels’ histogram view. In this case histograms of individual channels are not stacked, but instead overlaid in different colors with line plots (Supplementary figure 1C).

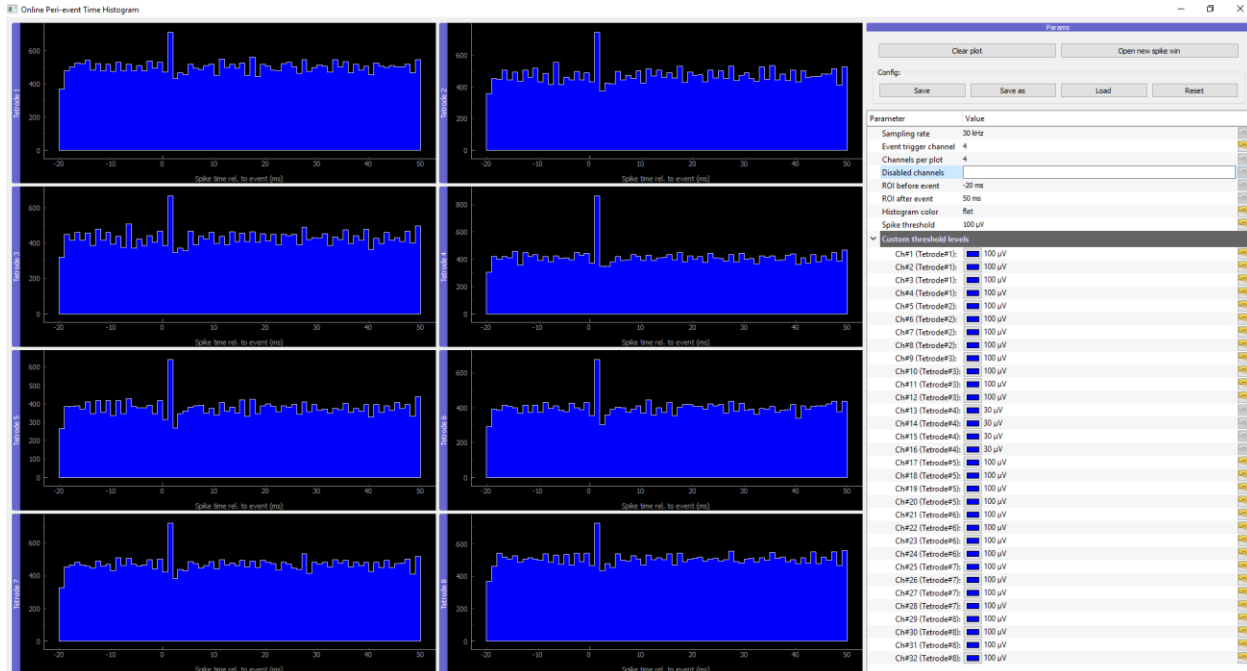

**Figure 2: Main GUI of OPETH.** The histograms of the different channels or polytrodes are displayed on the left side of the window. The menu on the right side allows changing the parameters and interacting with the GUI.

‘Sampling rate’ should be adjusted to match the samples per second of the Open Ephys ‘RHYTHM FPGA’ module. Changing the ‘channels per plot’ option automatically changes the number of histograms displayed. Briefly, ‘Clear plot’ clears all histograms and ‘Open new spike win’ initiates a new spike window (see below). The parameters can be saved and loaded for each experimental subject. The threshold options allow selection of a global threshold applied on all channels or individual thresholds for each channel. The ‘event trigger channel’ sets which Open Ephys I/O board channel is used as trigger for the histograms. The ROI options allow setting the time window before and after the trigger. Finally, ‘Disabled channels’ allows inactivating unused

or noisy channels.

A

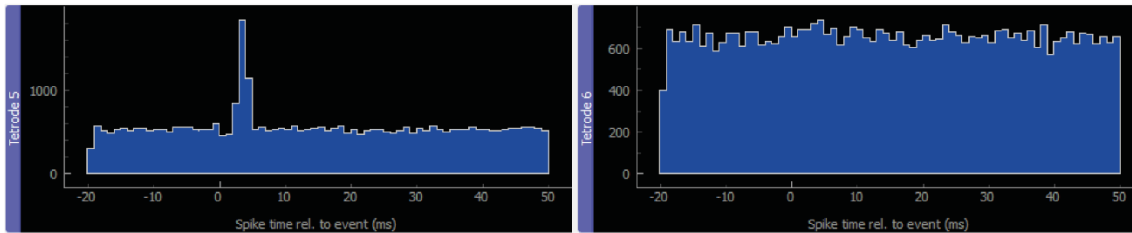

B

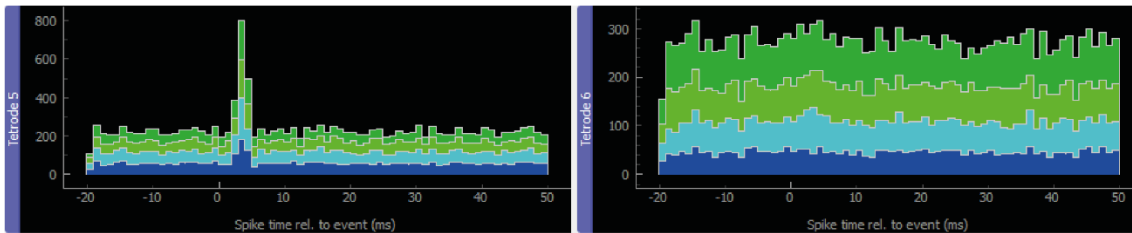

C

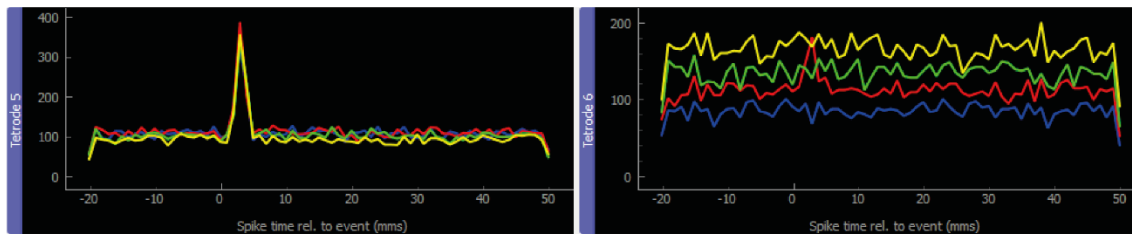

**Supplementary figure 1: Different visualization modes of the main GUI window. A)** Histogram color, B) Aggregate and C) Channels views.

We implemented a way of storing all settings in configuration files in the ini file format. As it is a common use case to have multiple experimental projects running in parallel, there is a ‘Save as’ option to store the configuration in a different file. The system remembers the last stored config (file path is stored in the ‘lastini.conf’ file) and loads it automatically on startup. Config file handling is based on the configparser python module.

*Raw analog data window.* A real time data viewer window was implemented to display data received directly from Open Ephys, allowing low-level visualization of the output provided by the ZMQ plugin. Since the main purpose of this window is to provide feedback for debugging, channels are auto-scaled and thus do not provide information on actual voltage levels. The plot in the top half of the window is a one-second-long rolling display that plots all channels simultaneously (Supplementary figure 2, top). In the interest of CPU time, the plot is updated at a low frame rate and the data displayed are downsampled to 1000 Hz for this view. The bottom part of the window features a stimulus counter and presents short windows of the same analog data, uncompressed and aligned to the trigger stimuli (Supplementary figure 2, bottom). The



window boundaries with respect to the trigger are set by the parameters ‘ROI before event’ and ‘ROI after event’. This window can be closed independently of the main window if not required.

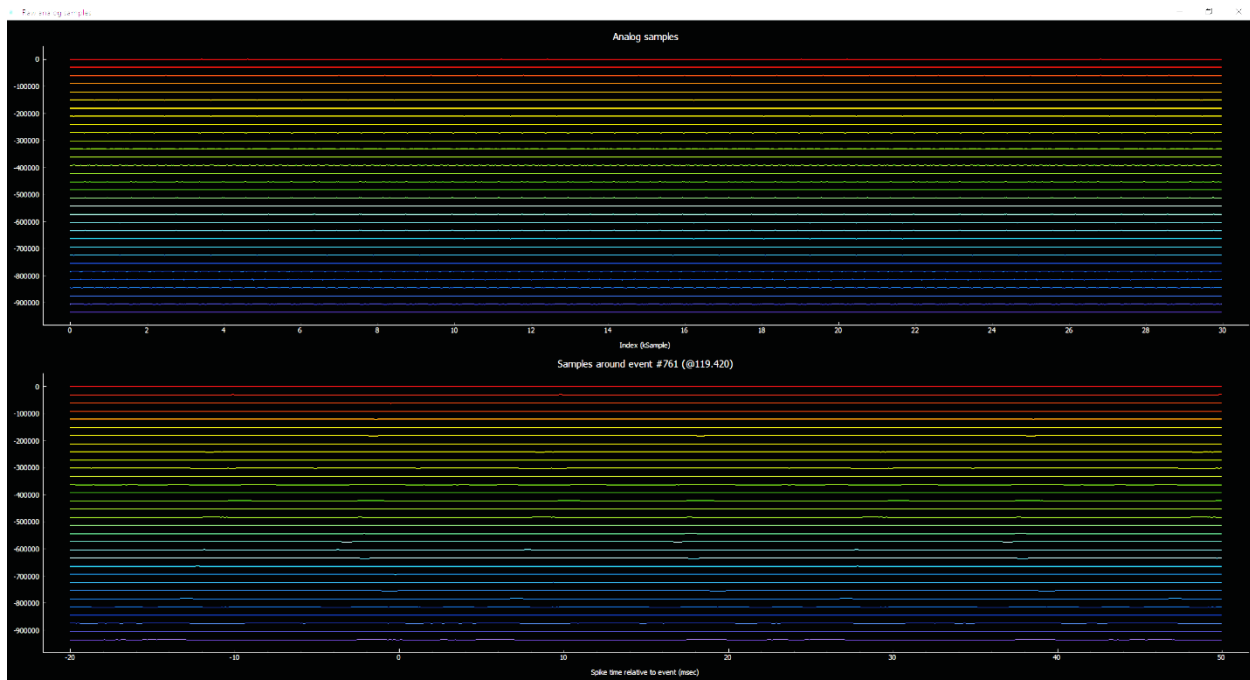

## Supplementary figure 2: Raw analog data window

*Spike window.* Spike waveforms triggered on TTL can be visualized in separate Spike windows. Spike windows can be opened from the main histogram window and are handled by `spike_gui.py`. Each window displays spikes of a single channel; the selected channel can be changed real time. The plot displayed in the top part of the window shows the raw input data of the channel aligned to the event, with the detected spikes overlaid in color. These detected spikes are enlarged separately in the bottom part with the same color code. The raw data display of the Spike window presents uncompressed data within the region of interest around the trigger (as set in parameters). The spike plots display a short segment of data before and after the peak value (red dot) of the spikes (-0.3 ms to +1 ms by default). If the ‘Update only on spike’ option is selected, spike windows are updated when new spikes are detected within the ROI of the trigger; otherwise, spike windows are updated 5 times per second even when no spikes are present. Multiple Spike windows can be displayed simultaneously, however, this is CPU intensive and opening too many Spike windows will slow down the application (Figure 3).

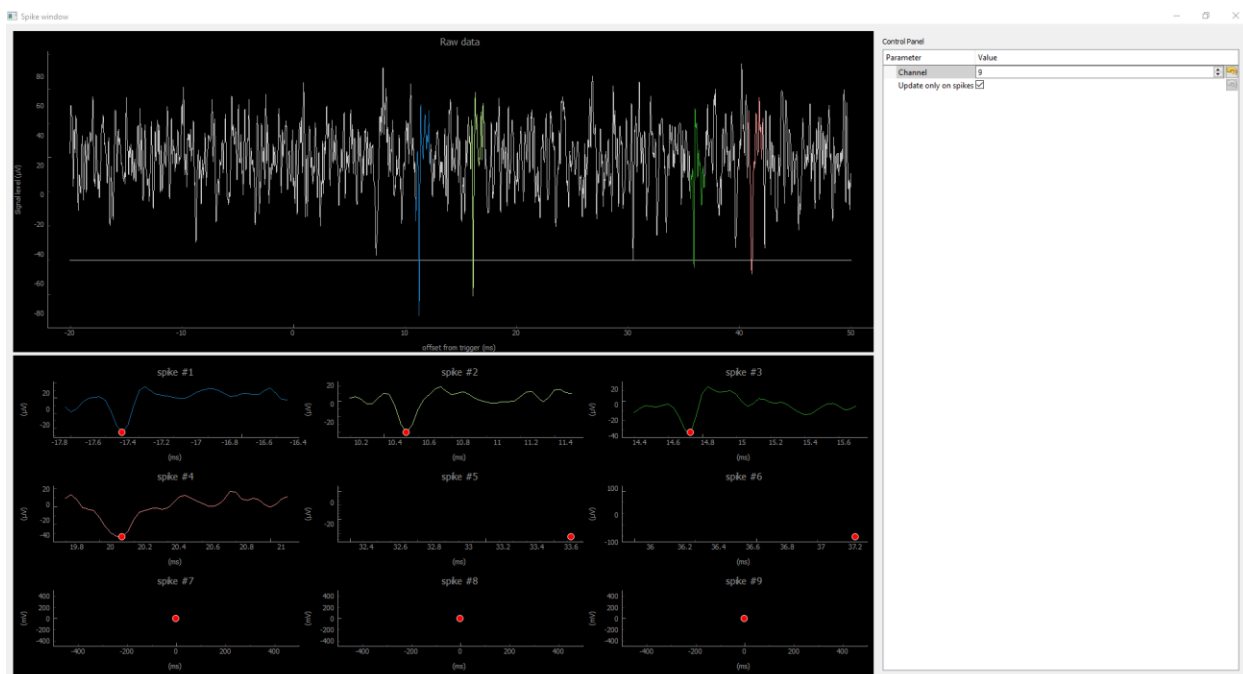

**Figure 3: Spike window.** Top, continuous data from the selected channel with spikes detected in restricted temporal windows (ROI) around the trigger TTLs, overlaid in color. Horizontal line shows the spike detection threshold. Bottom, zoomed-in windows for the same detected spikes.

### *Operation overview*

Until the Open Ephys ZMQ plugin connection is established, the GUI displays “Awaiting data”. Once the first chunk of data is received, the exact GUI layout is determined based on the number of channels and the histogram plots are displayed.

Input data arriving from Open Ephys is handled by `comm.py`, which takes care of parsing the JSON structures containing the measurement samples and trigger events. Depending on the type of the parsed input data, trigger events are stored in `OpenEphysEvent` objects (defined in `openephys.py`) and sample data are stored directly in a 2D circular (or rolling) buffer implemented in `circbuff.py`; the data flow is managed by the `Collector` class in `colldata.py` (see Figure 4). The `openephys.py` and some of the `comm.py` interface routines are based on the python samples created by Francesco Battaglia, while we have developed the circular buffer and `colldata.py` data handling methods from scratch as well as the entire visualization UI.

The circular buffer allows storing the last few seconds of data for the raw data displays, which gets downsampled by the `compress` method of `DataProc` class in `colldata.py` to save CPU time when plotting all signals simultaneously. Only minimum and maximum values are displayed for every 30 data points. The compressed data is used in the raw analog data window only. The spike detection is performed on the original data as discussed in detail later.

The data collection, spike detection and all plot updates are scheduled by the main loop in `gui.py` by the `update()` method that is periodically called by the Qt environment. We note that while the current implementation is single threaded except for ZMQ messaging, it is worth exploring options for multiprocessing in future updates. Figure 4 shows a schematic version of the data flow.

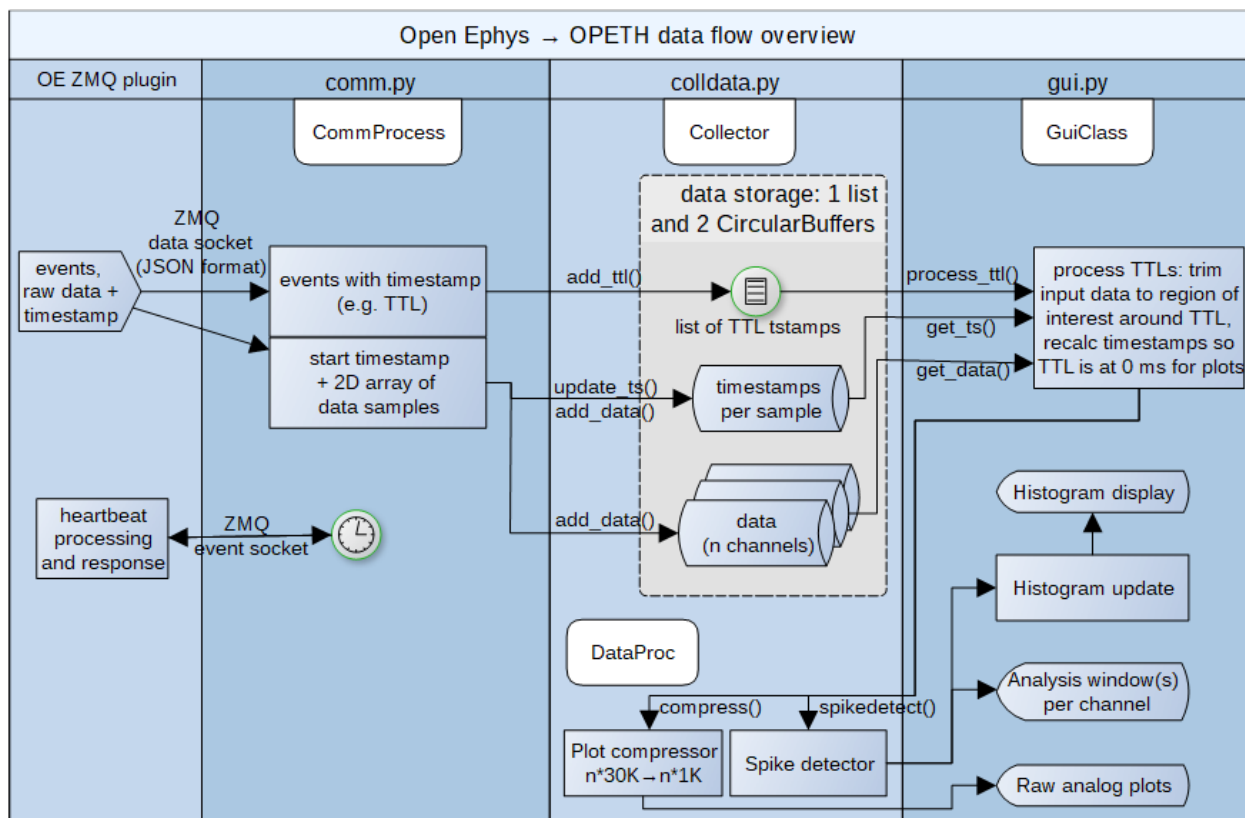

**Figure 4: Simplified diagram of data flow.**

### *Spike detection*

We created a spike discrimination routine independent of Open Ephys spike detectors that resides in the `DataProc` class of `colldata.py`. The `spikedetect()` is called by the `update()` routine whenever a new TTL signal or other event is detected on the currently selected trigger channel. It performs simple spike discrimination based on voltage levels within the region of interest (ROI) around the stimulus or timestamped event. Whenever a spike is detected because of exceeding the threshold level, new spikes are not detected until a predefined holdoff time is passed and the voltage level drops below threshold again. The implementation works by default with negative threshold levels to allow extracellular spike detection on non-inverted raw voltage data. (This can be modified via the `NEGATIVE_THRESHOLD` constant of `gui.py`). As higher level spike source identification was not a target of our tool, spikes are identified per channel and are not sorted or verified across multiple channels. Overlapping trigger ROIs may result in repeatedly detected spikes in the overlapped region (i.e. some spikes appear twice in the histogram).

Spike detection is done in two phases: first the input data is thresholded by comparing the analog input levels to the threshold parameter, then the thresholded array is processed channel by channel. For each spike on the given channel the starting and final position exceeding the threshold is determined, and between them the maximum or minimum value of the input data (depending on spike polarity) gives the spike position.

If the spike detection happens on negative threshold, the falling edge of the input signal is to be detected, in which case the positive threshold value of the GUI setting is automatically inverted for the `spikedetect` function. The thresholding is performed in a single step for all channels, with possibly unique threshold levels per channel. This results in a 2D array with one row per channel, each column containing Boolean values indicating whether the given sample is exceeding the rising/falling edge threshold level. Non-disabled channels are searched one by one for spikes in a loop. The code excerpts below show the negative threshold case with local minimum search as depicted on Figure 5.

```
def spikedetect(self, data, timestamps, threshold = SPIKE_THRESHOLD,
                rising_edge = False, disabled = []):
    (...)
    thresholded = data <= threshold

    for i in range(data.shape[0]):
        if i not in disabled:
            (...)
            ch_thresholded = thresholded[i,:]
```

To detect a spike we look for the first False→True transition in the thresholded array for the starting position (`first_over_thresh`). The end of the spike is the next nearest True → False transition in the thresholded data (`next_below_thresh`). Search for the next spike starts from this end position (`offset`), following a predefined dead time/censoring period of 0.75 ms by default (`SPIKE_HOLDOFF_SAMPLES`) to avoid repeated detection of the same spikes. The spike position (position of the negative peak or minimum value) and timestamps are then collected into lists for the `spikedetect` function return values with one list of spike positions per channel.

```
offset = 0
while len(ch_thresholded[offset:])>0:
    # get the index of the first element exceeding threshold
    first_over = np.argmax(ch_thresholded[offset:])

    # check whether the return value of argmax is valid
    # -> exit from inner loop if nothing over threshold limit left
    if first_over == 0 and ch_thresholded[offset] == False:
        break

    first_over += offset
    next_within = np.argmin(ch_thresholded[first_over:])
```

```

if next_within == 0: # end of data, still over threshold
    next_within = len(ch_thresholded)
else:
    next_within += first_over

# falling edge detection: search for minimum
drange = range(first_over, next_within)
spike_tip_pos = np.argmin(data[i, drange]) + first_over
# store spike in a per-channel list
ch_pos.append(spike_tip_pos)

# Continue processing after current spike
offset = max(first_over + SPIKE_HOLDOFF_SAMPLES, next_within)

```

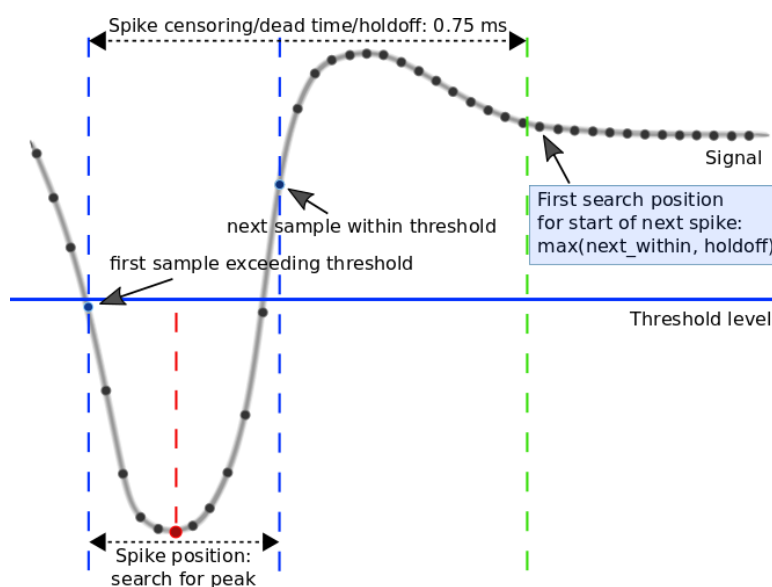

**Figure 5: Schematics of spike detection.** Key variables for spike detection based on threshold crossings are indicated. Note that sample count does not correspond to default 30kS/s.

Spike thresholds can be adjusted individually for each channel or for all channels at the same time, using either  $\mu\text{V}$  or  $\text{mV}$  as unit of measurement. The region of interest around events for spike detection is set in milliseconds. It is possible to disable channels or sets of channels from spike detection, e.g. in case of broken channels. Such channels can be listed either comma-separated or with the dash notation (1, 2, 3 or 1-3) in the disabled channels input field. The histograms of the disabled channels are not updated.

### *In vivo experimental procedures*

**Animals.** Electrophysiological, optogenetic and behavioral data showed in this study were obtained from two adult female mice (BAC-Vglut2-IRES-Cre, C57Bl/6J and ChAT-IRES-Cre, B6129F1). All experiments were approved by the Committee for the Scientific Ethics of Animal Research of the National Food Chain Safety Office and were performed according to the guidelines of the institutional ethical code and the Hungarian Act of Animal Care and

Experimentation (1998; XXVIII, section 243/1998, renewed in 40/2013) in accordance with the European Directive 86/609/CEE and modified according to the Directives 2010/63/EU.

*Surgery and virus injection.* Mice were anesthetized with an intraperitoneal injection of ketamine-xylazine (0.166 and 0.006 mg/kg, respectively). The scalp was shaved and disinfected (Betadine) and local anesthetics was applied subcutaneously (Lidocaine). The mouse was positioned in the stereotaxic frame and the eyes were protected with eye ointment (Laboratories Thea). The skin was removed above the calvaria and the skull was cleaned; the head of the animal was leveled using Bregma and Lambda (Paxinos et al., 2001) and lateral points equidistant from the sagittal suture.

In the Vglut2-Cre animal, a cranial window was opened in order to access the medial septum (MS) with a 10° lateral angle (MS 10°, antero-posterior +0.90 mm, lateral, 0.90 mm). An adeno-associated virus vector allowing Cre-dependent expression of channelrhodopsin2 [AAV 2/5. EF1a.Dio.hChR2(H134R)-eYFP.WPRE.hGH] was injected into the MS at 3.95, 4.45 and 5.25 mm depth from skull surface (200 nl at each depth). The skin was sutured; local antibiotics (Neomycin) and a subcutaneous injection of analgesic (Buprenorphine 0.1 mg kg<sup>-1</sup>) were applied.

In the ChAT-Cre animal a craniotomy was performed above the horizontal nucleus of the diagonal band of Broca of the basal forebrain (HDB, antero-posterior 0.75 mm, lateral 0.60 mm) and the same virus was injected into the HDB at 5.00 and 4.70 mm depth from skull surface (300 nl at each depth). Additional holes were drilled above the parietal cortex for ground and reference. The surface of the skull was covered with a thin layer of Super-Bond C&B (Sun Medical) and a custom-built microdrive (Hangya et al., 2015; Kvitsiani et al., 2013) with 8 tetrodes was implanted in the targeted area. The microdrive-skull junction was protected with Kwik-Cast sealant (World Precision Instruments). The microdrive was secured to the skull with dental acrylic resin (Lang Dental). A titanium headbar was also attached to the skull to allow headfixation. Analgesic and antibiotics were applied as above.

Mice were allowed to recover for ten days, receiving subcutaneous injections of analgesic (Buprenorphine 0.1 mg kg<sup>-1</sup>) and local application of antibiotics (Neomycin) as necessary.

*Anesthetized recordings.* Twenty days after the virus injection the Vglut2-Cre animal was anesthetized with an i.p. injection of 20% urethane (Sigma-Aldrich, 0.007 ml g<sup>-1</sup> body weight). The depth of anesthesia was evaluated by pinching the paw or ear of the animal. When there were no reflexes elicited by the pinching, the throat was shaved and topical lidocaine was applied. A tracheotomy was performed in order to sustain a constant airflow (Moldestad et al., 2009). The animal was placed in a stereotaxic frame and, after opening the skin and leveling the skull, trephine holes were made above the MS (silicon probe MS 10°, antero-posterior, +0.90 mm, lateral, 0.90 mm; optic fiber MS 5° contralateral, antero-posterior, +0.90 mm, lateral, -0.50 mm), the hippocampus (silicon probe HPC, antero-posterior, -2.20 mm, lateral, 1.50 mm) and two above the cerebellum for reference electrodes. A Neuronexus A1x32-6mm-50-177-CM32

silicon probe was placed in the hippocampus at 2.20 mm depth from skull surface, and a Neuronexus Buzsaki32-H32\_21mm probe was lowered to the dorsal boundary of the MS at a 10° lateral angle (3.95 mm from skull surface). Reference electrodes for both probes were placed in the cerebellum and ground electrode was placed in the spinotrapezius muscle. A 200 µm core optic fiber was lowered 500 µm above the shanks of the MS probe. The MS probe and the optic fiber were lowered in 100 µm steps for recording, spanning the entire depth of the MS. Extracellular data were collected by the Open Ephys data acquisition system, digitized at 30 kS/s. Each recording session consisted of an optical tagging period of two minutes, followed by a baseline period of five minutes. Three consecutive repetitions of one-minute tail pinch induced theta activity followed by one-minute control recording were applied, finishing the recording session with another two minutes length optical tagging period. After each recording session, the MS probe and optic fiber were lowered 100 µm.

*Head-fixed recordings and behavioral procedures:* Once fully recovered, the drive-implemented Chat-Cre animal was trained on a head-fixed auditory cued outcome task implemented in a go/no-go paradigm. Briefly, the animal was water restricted for three days. On the fourth day, the animal was head-fixed in the behavioral environment (Solari et al., 2018), where after a few free water delivery trials, a go tone (10 kHz, 50 dB, 1 s) was presented. Licking during the tone resulted in the release of a 3 µl water droplet as reward. Once the animal was familiarized with this paradigm, a second tone (4 kHz, 50 dB, 1 s) was introduced, predicting the delivery of an air puff (duration, 200 ms). In the final task, a balanced mixture of the two tones were randomly interleaved in which the 10 kHz tone predicted expected reward in 80% of trials, unexpected punishment in the 10% of the trials and omission in the remaining 10% of trials; the 4 kHz tone predicted expected punishment the 65% of trials, unexpected reward in the 25% of the trials and omissions in the remaining 10%. Extracellular data were collected during task performance by the Open Ephys data acquisition system, digitized at 30 kS/s.

*Data analysis:* Offline data analysis was performed using built-in and custom-built Matlab (Mathworks) scripts. Action potentials were manually sorted into putative neuronal clusters based on amplitude (peak-to-valley), waveform energy and first principal component features using the MClust software (A. D. Redish). L-ratio (<0.05) and isolation distance (>20) were taken as cluster quality measures (Schmitzer-Torbert et al., 2005).

Vglut2 positive neurons were identified by optogenetic tagging (Kvitsiani et al., 2013; Lima et al., 2009; Pi et al., 2013). Significant light activation was assessed by the Stimulus-Associated spike Latency Test (SALT), using the code available at <http://kepecslab.cshl.edu/salt.m> (Kvitsiani et al., 2013).

## Results



In the following, we provide two example applications of OPETH. First, we used OPETH for online optogenetic tagging of medial septal glutamatergic neurons in an acute anesthetized experiment. Second, we performed chronic recordings from the horizontal nucleus of the diagonal band of Broca (HDB) while a mouse performed a head-fixed auditory cued outcome task. We demonstrated the presence of punishment-activated HDB neurons during the recording online with OPETH, and later confirmed this result by offline analyses.

### *Real-time optogenetic tagging*

Optogenetic tagging allows the identification of neuron types in extracellular recordings performed in transgenic animals. For instance, we use optogenetic tagging in acute anesthetized experiments to investigate the role of different genetically defined types of medial septal (MS) neurons in the genesis of neural oscillations and network synchrony (Buzsáki and Moser, 2013; Hangya et al., 2009; Wang, 2002). However, the yield of such experiments can greatly be increased if the presence of optogenetically tagged neurons can be established online during the recording. Additionally, real-time feedback helps reducing artifacts in the recordings introduced by photostimulation.

Therefore, we tested OPETH in this *in vivo* optogenetic tagging experiment. A BAC-Vglut2-IRES-Cre mouse previously injected with a viral construct allowing Cre-dependent expression of the light sensitive channelrhodopsin2 protein in glutamatergic MS neurons was anesthetized with urethane. A 32-channel linear silicone probe was placed in the hippocampus for local field potential recordings and a 32-channel four-shank silicon probe was lowered into the MS for extracellular recording of MS units. In addition, an optic fiber was placed in the MS above the recording probe to deliver laser light for photostimulation. Throughout the experiment, laser-triggered responses of the MS neurons were monitored by the OPETH *Histogram Window* (Fig. 6A). Once putative light-evoked action potentials were detected, the *Channel view* was used to assess the channel with the largest light effect (Fig. 6B). *Spike Window* for this channel was then opened and monitored while adjusting light intensity levels to avoid photoelectric effects (Fig. 6C-D). This protocol allowed us to ‘hunt’ for optogenetically identified glutamatergic MS neurons with removing the potential confounds arising from photostimulation-related electrical artifacts, increasing the efficiency of the experiment.

After concluding the experiment, we performed offline peri-event time histogram analysis, aligned to the onset of the photostimulation pulses. This confirmed the presence of light responses on the same tetrodes as shown by OPETH (Fig. 6E). Finally, spike sorting of three recording sessions revealed significantly light-activated neurons recorded by the same tetrodes as indicated by OPETH ( $n = 10$ ,  $p < 0.001$ , Fig. 6F).



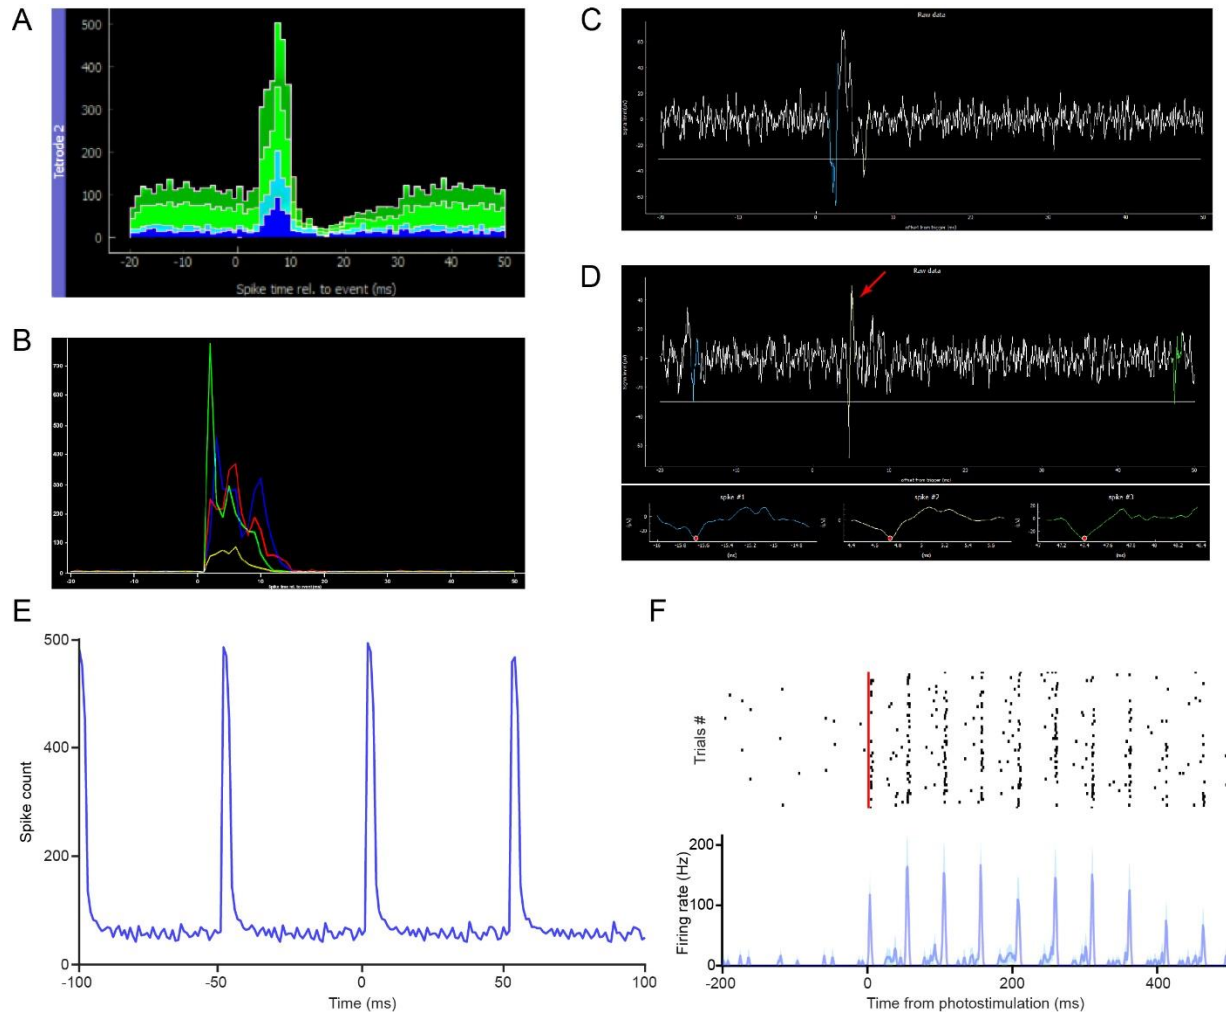

**Figure 6: *In vivo* optogenetic tagging experiment for testing OPETH.** A) *Histogram Window*, ‘aggregate view’ showing neural responses to laser pulses in a Vglut2-Cre mouse expressing channelrhodopsin2. B) ‘*Channel view*’ was used to determine the most responsive channel of the tetrode of interest. C) ‘*Spike window*’ of the selected channel showing a photoelectric artifact evoked by high intensity laser stimulation. D) The *Spike Window* allowed us to tune down the light intensity until the putative tagged cell was not masked by artifacts (red arrow). E) The offline peri-event time histogram showed strong light-evoked activity on the selected tetrode. F) Spike raster and peri-event time histogram of a responsive MS neuron aligned to the onset of the laser pulse train, from the channel selected via OPETH.

#### *Real-time peri-event time histogram in behaving mice*

In addition to optogenetic tagging, OPETH enables online tracking of neural responses to behaviorally relevant external events such as cue stimuli and reinforcement. To demonstrate this, we next tested OPETH’s ability to detect neuronal activity changes during a head-fixed go/no-go task in an awake behaving mouse.

A mouse was fully trained on a head-fixed auditory cued outcome task, in which two pure tones of different pitch signaled different outcome probabilities, predicting either likely reward (water) vs. surprising punishment (a puff of air) or vice versa. Two different TTL pulses were sent to the Open Ephys I/O board every time reward or punishment was delivered, allowing OPETH to visualize the neuronal response to each of the behavioral outcomes. The mouse performed a total of 254 trials in a single recording session. Throughout this session, the *Histogram Window* of OPETH clearly showed a neuronal response to punishment on most tetrodes (Fig. 7A), while no response to reward delivery could be detected (Fig. 7B). We noted that this punishment response was already detectable after the first few punished trials, showing the sensitivity of detection by OPETH.

After the recording session, offline analysis confirmed the presence of neurons that responded selectively to punishment, as expected based on the online feedback by OPETH. Fig. 7C-E shows a well isolated neuron that responded with an increase of firing after air puff punishment, but not after water reward.

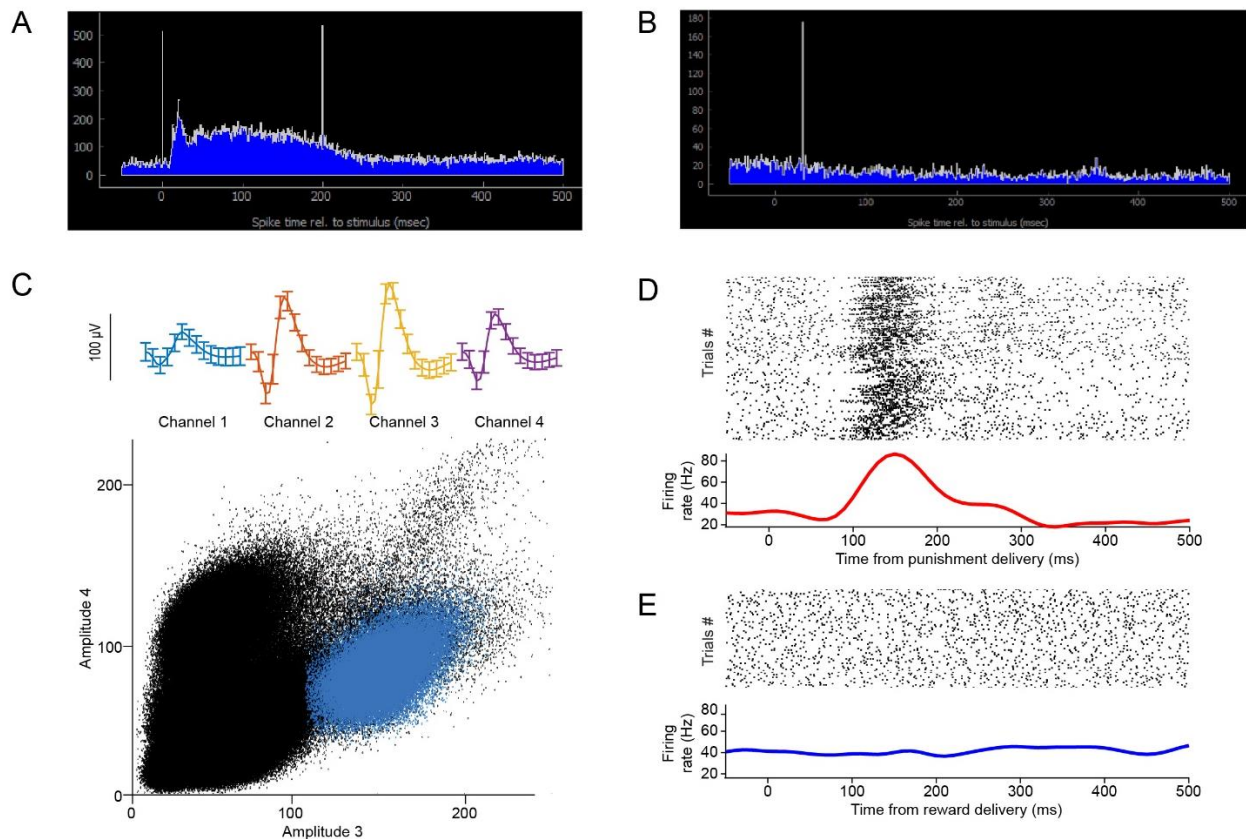

**Figure 7: Neuronal responses to behaviorally relevant events detected real-time by OPETH.** A) Most of the tetrodes showed an increase in neuronal activity in response to punishment delivery (vertical lines indicate artifacts due to valve opening and closing). B) No neuronal response was detected after reward delivery. C) Spike shape and cluster projection of an example punishment-activated reward-unresponsive neuron after offline spike sorting. D) Spike raster and PETH aligned to the onset of punishment delivery. E) Spike raster and PETH aligned to the onset of reward delivery.

## Discussion

Real-time feedback while performing electrophysiology recordings is important to guide decisions during the experiment. Here we described OPETH, an open source online tool for providing such feedback by visualizing peri-event time histograms. In addition, we demonstrated its usefulness when conducting optogenetic tagging or behavioral experiments combined with single cell or multiunit recording. OPETH is based on Open Ephys, an open source data acquisition system including software (Siegle et al., 2017).

### *Open source*

There is an increasing number of open source tools in neuroscience, which is also paralleled by an increased awareness of the open source movement in general (Gleeson et al., 2017). An important example is Open Ephys, enabled by the development of Intan chips that allowed an affordable upscaling of electrophysiology experiments. Combined with open source tools for behavior control (Sanders and Kepecs, 2012), stimulation (Sanders and Kepecs, 2014) and full behavioral environments (Devarakonda et al., 2016; Erlich et al., 2011; Solari et al., 2018), this array of recent tools has changed the way electrophysiology experiments are performed. We provide OPETH as a new member of this family that parallels the richness of features of commercial solutions (e.g. Neuralynx Histogram Display, <https://neuralynx.com/software/category/sw-acquisition-control>), at the same time available to the entire neuroscience community.

### *Application: real-time in vivo cell type identification*

In neuroscience, many of the key insights were gained by recording the electrical activity of neurons (Sviatkó and Hangya, 2017). An instructive example was the mapping of basal ganglia neurons while monkeys were engaged in a variety of behavioral tasks (DeLong, 1971; DeLong et al., 1984). DeLong and colleagues performed basic linear convolution-based data analysis in the form of raster plots and peri-event time histograms, which still remains the mainstay of systems neuroscience. Eventually, these results lead to the Deep Brain Stimulation surgeries during which stimulating electrodes are lowered to the subthalamic nucleus of the basal ganglia in Parkinson's patients, largely alleviating their otherwise often crippling motor impairments. However, the lack of proper tools to identify the great diversity of anatomically, histochemically

and hodologically defined cell types of the basal ganglia *in vivo* stalled further progress (Sviatkó and Hangya, 2017).

This was first overcome by glass pipettes that allowed filling of the recorded cells by applying current pulses, called juxtacellular recording (Pinault, 1996). Then, the recent advent of imaging and optogenetic techniques (Ghosh et al., 2011; Park et al., 2015; Shin et al., 2017) opened the way to high-throughput cell type identification in awake, behaving rodents (Al-Hasani et al., 2015; Miller et al., 2019; Wang et al., 2019). This necessitates the development of new software tools aligned to this task, enabling significant increases of experimentation efficiency. OPETH provides a way of online tracking cellular responses to light flashes, in order to optogenetically identify those neurons that respond by short latency. This allows determining whether the target area has been reached, and good quality recordings of identified units can be performed. Therefore, by enabling ‘hunting’ for neurons of interest, this tool can efficiently increase the yield of optogenetic tagging experiments.

#### *Application: online tracking of response properties to behaviorally relevant events*

Peri-event time histograms usually represent the first-pass analysis of neuronal activity of behaving animals (Endres et al., 2008; Shimazaki and Shinomoto, 2010). We have demonstrated here that this first-level analysis can be performed online, providing immediate feedback on the responsiveness of the recorded population. This may be especially useful when looking for neurons with a particular response profile, or cell types that can be identified by features of their responses. Since areas may differ significantly in the proportion of neurons responding to different sensory cues, OPETH may also allow the rough identification of target areas. Other applications include online receptive field mapping (Froemke et al., 2007) or precise localization along the frequency axis of auditory cortical tonotopy maps (Hromádka et al., 2008).

#### *Conclusions and future directions*

By providing online access to event-aligned linear data statistics, OPETH also opens the door to more advanced online analysis. For instance, dopaminergic neurons in VTA may be identified by principal component analysis of their PETH aligned to reward and reward-predicting cues, as demonstrated by Cohen and colleagues (Cohen et al., 2012) and later applied by other labs (Takahashi et al., 2016). Therefore, adding this analysis to OPETH may allow online identification of dopaminergic cells without performing optogenetics. Other examples include online analysis of delay activity in working memory tasks, or correlating neuronal firing with reward expectations or prediction errors.

OPETH also allows future implementation of closed-loop protocols. Closed-loop approaches are gaining momentum as part of experimental procedures (El Hady, 2016) as well as in clinical applications (Ghasemi et al., 2018). Closed-loop neuronal recording in behavioral tasks has been used for assessing the role of the mouse primary visual cortex during navigation (Saleem et al., 2013), enhancing spatial navigation skills of mice by optical manipulation of the hippocampal

theta oscillation cycles (Siegle and Wilson, 2014), determining the causal involvement of sharp wave ripple events in learning (Rangel Guerrero et al., 2018) and to control *Drosophila* feeding behavior (Moreira et al., 2019). OPETH can be used as a programmable open-source tool for closed-loop paradigms based on the detected neuronal activity, allowing high-precision automatic control of the desired output.

## Acknowledgements

We thank Nicola Solari for insightful comments on the manuscript. This work was supported by the ‘Lendület’ Program of the Hungarian Academy of Sciences (LP2015-2/2015), NKFIH KH125294 and the European Research Council Starting Grant no. 715043 to BH. BH is a member of the FENS-Kavli Network of Excellence.

## Author contributions

BH conceived the project. AS developed the OPETH software, SMB and PH performed the experiments and data analysis, SMB and AS prepared the figures, BH, AS and SMB wrote the manuscript with inputs from PH.

## Conflict of Interest

The authors declare that the present work was conducted in the absence of any personal, professional or commercial relationship that could result in a potential conflict of interest.

## References

- Al-Hasani, R., McCall, J. G., Kash, T. L., Rogers, J. A., Bruchas, M. R., Shin, G., et al. (2015). Distinct Subpopulations of Nucleus Accumbens Dynorphin Neurons Drive Aversion and Reward Article Distinct Subpopulations of Nucleus Accumbens Dynorphin Neurons Drive Aversion and Reward. *Neuron* 87. doi:10.1016/j.neuron.2015.08.019.
- Ascoli, G. a, Alonso-Nanclares, L., Anderson, S. a, Barrionuevo, G., Benavides-Piccione, R., Burkhalter, A., et al. (2008). Petilla terminology: nomenclature of features of GABAergic interneurons of the cerebral cortex. *Nat. Rev. Neurosci.* 9, 557–68. doi:10.1038/nrn2402.
- Boyden, E. S., Zhang, F., Bamberg, E., Nagel, G., and Deisseroth, K. (2005). Millisecond-timescale, genetically targeted optical control of neural activity. *Nat. Neurosci.* 8, 1263–1268.
- Buzsáki, G., and Moser, E. I. (2013). Memory, navigation and theta rhythm in the hippocampal-entorhinal system. *Nat. Neurosci.* 16, 130–138. doi:10.1038/nn.3304.
- Cardin, J. A., Carlén, M., Meletis, K., Knoblich, U., Zhang, F., Deisseroth, K., et al. (2010). Targeted optogenetic stimulation and recording of neurons in vivo using cell-type-specific expression of Channelrhodopsin-2. *Nat. Protoc.* 5, 247–254. doi:10.1038/nprot.2009.228.



- Cohen, J. Y., Haesler, S., Vong, L., Lowell, B. B., and Uchida, N. (2012). Neuron-type-specific signals for reward and punishment in the ventral tegmental area. *Nature* 482, 85–8. doi:10.1038/nature10754.
- DeLong, M. R. (1971). Activity of pallidal neurons during movement. *J. Neurophysiol.* 34, 414–27.
- DeLong, M. R., Georgopoulos, A. P., Crutcher, M. D., Mitchell, S. J., Richardson, R. T., and Alexander, G. E. (1984). Functional organization of the basal ganglia: contributions of single-cell recording studies. *Ciba Found. Symp.* 107, 64–82.
- Devarakonda, K., Nguyen, K. P., and Kravitz, A. V. (2016). ROBucket: A low cost operant chamber based on the Arduino microcontroller. *Behav. Res. Methods* 48, 503–509. doi:10.3758/s13428-015-0603-2.
- El Hady, A. (2016). *Closed loop neuroscience*. Academic Press.
- Endres, D., Oram, M., Schindelin, J., and Foldiak, P. (2008). Bayesian binning beats approximate alternatives: estimating peri-stimulus time histograms. *Adv. Neural Inf. Process. Syst.* 2007, 393–400.
- Erlich, J. C., Bialek, M., and Brody, C. D. (2011). A Cortical Substrate for Memory-Guided Orienting in the Rat. *Neuron* 72, 330–343. doi:10.1016/j.neuron.2011.07.010.
- Froemke, R. C., Merzenich, M. M., and Schreiner, C. E. (2007). A synaptic memory trace for cortical receptive field plasticity. *Nature* 450, 425–429. doi:10.1038/nature06289.
- Gentet, L. J., Kremer, Y., Taniguchi, H., Huang, Z. J., Staiger, J. F., and Petersen, C. C. H. (2012). Unique functional properties of somatostatin-expressing GABAergic neurons in mouse barrel cortex. *Nat. Neurosci.* 15, 607–12. doi:10.1038/nn.3051.
- Ghasemi, P., Sahraee, T., and Mohammadi, A. (2018). Closed- and Open-loop Deep Brain Stimulation: Methods, Challenges, Current and Future Aspects. *J. Biomed. Phys. Eng.* 8, 209–216. Available at: <http://www.ncbi.nlm.nih.gov/pubmed/29951448> [Accessed August 13, 2019].
- Ghosh, K. K., Burns, L. D., Cocker, E. D., Nimmerjahn, A., Ziv, Y., Gamal, A. El, et al. (2011). Miniaturized integration of a fluorescence microscope. *Nat. Methods* 8, 871–878. doi:10.1038/nmeth.1694.
- Gleeson, P., Davison, A. P., Silver, R. A., and Ascoli, G. A. (2017). A Commitment to Open Source in Neuroscience. *Neuron* 96, 964–965. doi:10.1016/j.neuron.2017.10.013.
- Hangya, B., Borhegyi, Z., Szilágyi, N., Freund, T. F., and Varga, V. (2009). GABAergic neurons of the medial septum lead the hippocampal network during theta activity. *J. Neurosci.* 29, 8094–102. doi:10.1523/JNEUROSCI.5665-08.2009.
- Hangya, B., Pi, H.-J., Kvitsiani, D., Ranade, S. P., and Kepecs, A. (2014). From circuit motifs to computations: Mapping the behavioral repertoire of cortical interneurons. *Curr. Opin. Neurobiol.* 26. doi:10.1016/j.conb.2014.01.007.
- Hangya, B., Ranade, S. P., Lorenc, M., and Kepecs, A. (2015). Central Cholinergic Neurons Are

- Rapidly Recruited by Reinforcement Feedback. *Cell* 162, 1155–1168.  
doi:10.1016/j.cell.2015.07.057.
- Harris, K. D., Hochgerner, H., Skene, N. G., Magno, L., Katona, L., Bengtsson Gonzales, C., et al. (2018). Classes and continua of hippocampal CA1 inhibitory neurons revealed by single-cell transcriptomics. *PLoS Biol.* 16, e2006387. doi:10.1371/journal.pbio.2006387.
- Hires, S. A., Gutnisky, D. A., Yu, J., O'Connor, D. H., and Svoboda, K. (2015). Low-noise encoding of active touch by layer 4 in the somatosensory cortex. *Elife* 4, 1–18.  
doi:10.7554/eLife.06619.
- Hromádka, T., Dewese, M. R., and Zador, A. M. (2008). Sparse representation of sounds in the unanesthetized auditory cortex. *PLoS Biol.* 6, e16. doi:10.1371/journal.pbio.0060016.
- Hubel, D. H., and Wiesel, T. N. (1959). Receptive fields of single neurones in the cat's striate cortex. *J. Physiol.* 148, 574–591. doi:10.1113/jphysiol.2009.174151.
- Kilgard, M. P., and Merzenich, M. M. (1998). Cortical map reorganization enabled by nucleus basalis activity. *Science* 279, 1714–8. doi:10.1126/science.279.5357.1714.
- Klausberger, T., and Somogyi, P. (2008). Neuronal diversity and temporal dynamics: the unity of hippocampal circuit operations. *Science* 321, 53–7. doi:10.1126/science.1149381.
- Ko, H., Hofer, S. B., Pichler, B., Buchanan, K. A., Sjöström, P. J., and Mrsic-Flogel, T. D. (2011). Functional specificity of local synaptic connections in neocortical networks. *Nature* 473, 87–91. doi:10.1038/nature09880.
- Kozai, T. D. Y., and Vazquez, A. L. (2015). Photoelectric artefact from optogenetics and imaging on microelectrodes and bioelectronics: new challenges and opportunities. *J. Mater. Chem. B* 3, 4965–4978. doi:10.1039/C5TB00108K.
- Kvitsiani, D., Ranade, S., Hangya, B., Taniguchi, H., Huang, J. Z., and Kepecs, A. (2013). Distinct behavioural and network correlates of two interneuron types in prefrontal cortex. *Nature* 498. doi:10.1038/nature12176.
- Lima, S. Q., Hromádka, T., Znamenskiy, P., and Zador, A. M. (2009). PINP: a new method of tagging neuronal populations for identification during in vivo electrophysiological recording. *PLoS One* 4, e6099. doi:10.1371/journal.pone.0006099.
- Lin, S.-C., and Nicolelis, M. a L. (2008). Neuronal ensemble bursting in the basal forebrain encodes salience irrespective of valence. *Neuron* 59, 138–49.  
doi:10.1016/j.neuron.2008.04.031.
- Mikulovic, S., Pupe, S., Peixoto, H. M., Do Nascimento, G. C., Kullander, K., Tort, A. B. L., et al. (2016). On the photovoltaic effect in local field potential recordings. *NeuroPhotonics* 3, 015002. doi:10.1117/1.NPh.3.1.015002.
- Miller, S. M., Marcotulli, D., Shen, A., and Zweifel, L. S. (2019). Divergent medial amygdala projections regulate approach–avoidance conflict behavior. *Nat. Neurosci.* 22, 565–575.  
doi:10.1038/s41593-019-0337-z.
- Moldestad, O., Karlsen, P., Molden, S., and Storm, J. F. (2009). Tracheotomy improves

- experiment success rate in mice during urethane anesthesia and stereotaxic surgery. *J. Neurosci. Methods* 176, 57–62. doi:10.1016/j.jneumeth.2008.08.015.
- Moreira, J.-M., Itskov, P. M., Goldschmidt, D., Baltazar, C., Steck, K., Tastekin, I., et al. (2019). optoPAD, a closed-loop optogenetics system to study the circuit basis of feeding behaviors. *Elife* 8. doi:10.7554/eLife.43924.
- Park, D.-W., Schendel, A. A., Mikael, S., Brodnick, S. K., Richner, T. J., Ness, J. P., et al. (2014). Graphene-based carbon-layered electrode array technology for neural imaging and optogenetic applications. *Nat. Commun.* 5, 5258. doi:10.1038/ncomms6258.
- Park, S. Il, Brenner, D. S., Shin, G., Morgan, C. D., Copits, B. A., Chung, H. U., et al. (2015). Soft, stretchable, fully implantable miniaturized optoelectronic systems for wireless optogenetics. *Nat. Biotechnol.* 33, 1280–1286. doi:10.1038/nbt.3415.
- Paxinos, G., Franklin, K. B. J., and Franklin, K. B. J. (2001). *The mouse brain in stereotaxic coordinates*. Academic Press Available at: [https://books.google.hu/books/about/The\\_Mouse\\_Brain\\_in\\_Stereotaxic\\_Coordinat.html?id=tZdjQgAACAAJ&redir\\_esc=y](https://books.google.hu/books/about/The_Mouse_Brain_in_Stereotaxic_Coordinat.html?id=tZdjQgAACAAJ&redir_esc=y) [Accessed July 5, 2019].
- Pi, H.-J., Hangya, B., Kvitsiani, D., Sanders, J. I., Huang, Z. J., and Kepecs, A. (2013). Cortical interneurons that specialize in disinhibitory control. *Nature* 503, 521–524. doi:10.1038/nature12676.
- Pinault, D. (1996). A novel single-cell staining procedure performed in vivo under electrophysiological control: morpho-functional features of juxtacellularly labeled thalamic cells and. *J. Neurosci. Methods*. Available at: <http://www.sciencedirect.com/science/article/pii/0165027095001441> [Accessed October 31, 2014].
- Rangel Guerrero, D. K., Donnett, J. G., Csicsvari, J., and Kovács, K. A. (2018). Tetrode Recording from the Hippocampus of Behaving Mice Coupled with Four-Point-Irradiation Closed-Loop Optogenetics: A Technique to Study the Contribution of Hippocampal SWR Events to Learning. *eNeuro* 5, ENEURO.0087-18.2018. doi:10.1523/ENEURO.0087-18.2018.
- Saleem, A. B., Ayaz, A., Jeffery, K. J., Harris, K. D., and Carandini, M. (2013). Integration of visual motion and locomotion in mouse visual cortex. *Nat. Neurosci.* 16, 1864–9. doi:10.1038/nn.3567.
- Sanders, J. I., and Kepecs, A. (2012). Choice ball: a response interface for two-choice psychometric discrimination in head-fixed mice. *J. Neurophysiol.* 108, 3416–3423. doi:10.1152/jn.00669.2012.
- Sanders, J. I., and Kepecs, A. (2014). A low-cost programmable pulse generator for physiology and behavior. *Front. Neuroeng.* 7, 43. doi:10.3389/fneng.2014.00043.
- Schmitzer-Torbert, N., Jackson, J., Henze, D., Harris, K., and Redish, A. D. (2005). Quantitative measures of cluster quality for use in extracellular recordings. *Neuroscience* 131, 1–11. doi:10.1016/j.neuroscience.2004.09.066.
- Schultz, W., Dayan, P., and Montague, P. R. (1997). A neural substrate of prediction and reward.



- Science* 275, 1593–1599. doi:10.1126/science.275.5306.1593.
- Shimazaki, H., and Shinomoto, S. (2010). Kernel bandwidth optimization in spike rate estimation. *J. Comput. Neurosci.* 29, 171–182. doi:10.1007/s10827-009-0180-4.
- Shin, G., Gomez, A. M., Al-Hasani, R., Jeong, Y. R., Kim, J., Xie, Z., et al. (2017). Flexible Near-Field Wireless Optoelectronics as Subdermal Implants for Broad Applications in Optogenetics. *Neuron* 93, 509-521.e3. doi:10.1016/j.neuron.2016.12.031.
- Siegle, J. H., López, A. C., Patel, Y. A., Abramov, K., Ohayon, S., and Voigts, J. (2017). Open Ephys: an open-source, plugin-based platform for multichannel electrophysiology. *J. Neural Eng.* 14, 045003. doi:10.1088/1741-2552/aa5eea.
- Siegle, J. H., and Wilson, M. A. (2014). Enhancement of encoding and retrieval functions through theta phase-specific manipulation of hippocampus. *Elife* 3. doi:10.7554/eLife.03061.
- Solari, N., Sviatkó, K., Laszlovszky, T., Hegedüs, P., and Hangya, B. (2018). Open Source Tools for Temporally Controlled Rodent Behavior Suitable for Electrophysiology and Optogenetic Manipulations. *Front. Syst. Neurosci.* doi:10.3389/fnsys.2018.00018.
- Sviatkó, K., and Hangya, B. (2017). Monitoring the right collection: The central cholinergic neurons as an instructive example. *Front. Neural Circuits* 11. doi:10.3389/fncir.2017.00031.
- Takahashi, Y. K., Langdon, A. J., Niv, Y., and Schoenbaum, G. (2016). Temporal Specificity of Reward Prediction Errors Signaled by Putative Dopamine Neurons in Rat VTA Depends on Ventral Striatum. *Neuron* 91, 182–93. doi:10.1016/j.neuron.2016.05.015.
- Wang, J., Shen, J., Kirschen, G. W., Gu, Y., Jessberger, S., and Ge, S. (2019). Lateral dispersion is required for circuit integration of newly generated dentate granule cells. *Nat. Commun.* 10, 3324. doi:10.1038/s41467-019-11206-9.
- Wang, X. J. (2002). Pacemaker neurons for the theta rhythm and their synchronization in the septohippocampal reciprocal loop. *J. Neurophysiol.* 87, 889–900. Available at: <http://www.ncbi.nlm.nih.gov/pubmed/11826054> [Accessed September 8, 2014].
